# Supplementary material for: Heterogeneous catalysts NiCoSe2 and NiCo2S4 for the effective synthesis of dihydropyrimidine-2-ones/thiones
Source: Royal Society of Chemistry journal article supplement (doi:10.1039/d4nj00285g), 2024-01-01
Supplement: d4nj00285g1.pdf [file d4nj00285g1.pdf]

## Supporting information

### Heterogeneous catalyst NiCoSe<sub>2</sub> & NiCo<sub>2</sub>S<sub>4</sub> for the effective synthesis of dihydropyrimidine-2-ones/thiones

Ramya. M <sup>a</sup>, Shivakumar. P <sup>a</sup>, Nagaraju D.H <sup>\*a</sup>, Lalithamba H.S <sup>b</sup>, Nagendra. G <sup>\*a</sup>

<sup>a</sup> Department of Chemistry, REVA University, Rukmini Knowledge Park, Kattigenahalli, Yelahanka, Bangalore-560 064, Karnataka, India

<sup>b</sup> Department of Chemistry, Siddaganga Institute of Technology, B.H. Road, Tumkur-572 103, Karnataka, India

\*Corresponding author.

E-mail: [gnagendrachem@gmail.com](mailto:gnagendrachem@gmail.com);

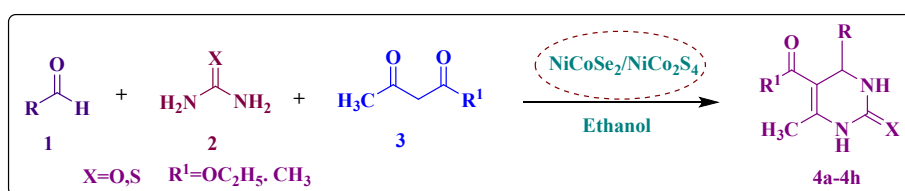

### Ethyl-1,2,3,4-tetrahydro-6-methyl-4-phenyl-2-thioxopyrimidine-5-carboxylate, (4a):

Yield 95%: <sup>1</sup>H NMR (400 MHz, DMSO-*d*<sub>6</sub>) δ 7.59 (s, 1H), 7.32 (m, 5H), 5.49 (s, 1H), 5.25 (s, 1H), 4.10 (q, 2H), 2.32 (s, 3H), 1.10 (t, 3H). <sup>13</sup>C NMR (400 MHz, DMSO-*d*<sub>6</sub>) δ 165.8, 153.2, 145.1, 143.3, 128.2, 127.4, 126.2, 101.1, 60.3, 54.7, 18.8, 14.5. MS: Cald. for C<sub>14</sub>H<sub>16</sub>N<sub>2</sub>O<sub>2</sub>S: *m/z*: 277.1011 [M<sup>++</sup>H], Found: 277.00.

### Ethyl 4-(2-fluorophenyl)-1,2,3,4-tetrahydro-6-methyl-2-thioxopyrimidine-5-carboxylate, (4b):

Yield 92 %: <sup>1</sup>H NMR (400 MHz, DMSO-*d*<sub>6</sub>) δ 10.36 (s, 1H), 9.58 (s, 1H), 7.37 – 7.30 (m, 1H), 7.27 – 7.22 (m, 1H), 7.21 – 7.14 (m, 2H), 5.45 (d, 1H), 3.98 – 3.91 (m, 2H), 2.30 (s, 3H), 1.05 (t, 3H). <sup>13</sup>C NMR (400 MHz, DMSO-*d*<sub>6</sub>) 180.8, 167.8, 160.5, 159.6, 129.6, 128.9, 128.9, 124.4, 104.4, 115.8, 61.9, 43.8, 15.6, 14.5. MS: Cald. for C<sub>14</sub>H<sub>15</sub>FN<sub>2</sub>O<sub>2</sub>S *m/z*: 295.0971 [M<sup>++</sup>H], Found =295.0896.

**Ethyl-4-(2,4-difluorophenyl)-1,2,3,4-tetrahydro-6-methyl-2-thioxopyrimidine-5-carboxylate, (4c):**

Yield 90 % :  $^1\text{H}$  NMR (400 MHz, DMSO- $d_6$ )  $\delta$  10.38 (s, 1H), 9.2 (s, 1H), 7.2 – 7.15 (m, 2H), 7.16 – 7.08 (m, 1H), 5.38 (d, 1H), 3.95 – 3.90 (m, 2H), 2.35 (s, 3H), 1.01(t, 3H).  $^{13}\text{C}$  NMR (400 MHz, DMSO- $d_6$ ) 173.10, 164.34, 147.39, 144.38, 134.73, 133.54, 128.84, 127.42, 121.10, 100.25, 60.24, 53.63, 17.66, 14.43. MS: Cald. for  $\text{C}_{14}\text{H}_{14}\text{F}_2\text{N}_2\text{O}_2\text{S}$   $m/z$ : 313.0434 [ $\text{M}^++\text{H}$ ], Found=313.0534.

**Ethyl-4-(4-bromo-3-chlorophenyl)-1,2,3,4-tetrahydro-6-methyl-2-oxopyrimidine-5-carboxylate, (4d):**

Yield 80 % :  $^1\text{H}$  NMR (400 MHz, DMSO- $d_6$ )  $\delta$  10.28 (s, 1H), 9.42 (s, 1H), 7.22 – 7.10 (m, 2H), 7.1 1– 7.01 (m, 1H), 5.22 (d, 1H), 3.82 – 3.89 (m, 2H), 2.18 (s, 3H), 1.05 (t, 3H).  $^{13}\text{C}$  NMR (400 MHz, DMSO- $d_6$ ) 173.78, 164.23, 145.28, 145.23, 133.62, 132.43, 128.88, 127.31, 120.17, 100.08, 60.12, 53.49, 17.63, 14.31. MS: Cald. for  $\text{C}_{14}\text{H}_{14}\text{BrClN}_2\text{O}_3$   $m/z$ : 307.1116 [ $\text{M}^++\text{H}$ ], Found = 307.1016.

**Ethyl-4-(2-chlorophenyl)-1,2,3,4-tetrahydro-6-methyl-2-oxopyrimidine-5-carboxylate, (4e)**

Yield 74% :  $^1\text{H}$  NMR (400 MHz, DMSO- $d_6$ )  $\delta$  10.26 (s, 1H), 9.45 (s, 1H), 7.27 – 7.32 (m, 1H), 7.17 – 7.14 (m, 1H), 7.11 – 7.08 (m, 2H), 5.35 (d, 1H), 3.48 – 3.84 (m, 2H), 2.20 (s, 3H), 1.01 (t, 3H).  $^{13}\text{C}$  NMR (400 MHz, DMSO- $d_6$ ) 182.8, 168.8, 161.5, 159.2, 128.6, 127.1, 128.2, 124.2, 103.4, 115.3, 61.5, 42.2, 14.5, 14.3. MS: Cald. for  $\text{C}_{14}\text{H}_{15}\text{ClN}_2\text{O}_3$   $m/z$ : 333.0434 [ $\text{M}^++\text{Na}$ ], Found =333.0334.

**1-(4-(2,4-difluorophenyl)-1,2,3,4-tetrahydro-6-methyl-2-thioxopyrimidin-5-yl)ethanone, (4f)**

Yield 85% :  $^1\text{H}$  NMR (400 MHz, DMSO- $d_6$ )  $\delta$  10.38 (s, 1H), 9.2 (s, 1H), 7.2 – 7.15 (m, 2H), 7.16 – 7.08 (m, 1H), 5.38 (d, 1H), 2.35 (s, 3H), 1.71(t, 3H).  $^{13}\text{C}$  NMR (400 MHz, DMSO- $d_6$ ) 195.5, 180.01, 163.10, 161.34, 157.2, 135.39, 123.02, 111.01, 103.9, 104.38, 43.73, 26.54, 15.84. MS: Cald. for  $\text{C}_{13}\text{H}_{12}\text{F}_2\text{N}_2\text{OS}$   $m/z$ : 281.0617 [ $\text{M}^+-\text{H}$ ], Found= 281.0286.

**1-(4-(4-bromo-3-chlorophenyl)-1,2,3,4-tetrahydro-6-methyl-2-thioxopyrimidin-5-yl)ethanone, (4g)**

Yield 91 %:  $^1\text{H}$  NMR (400 MHz, DMSO- $d_6$ )  $\delta$  10.18 (s, 1H), 9.02 (s, 1H), 7.12 – 7.08 (m, 2H), 7.11– 7.01 (m, 1H), 5.22 (d, 1H), 2.08 (s, 3H), 1.25 (t, 3H).  $^{13}\text{C}$  NMR (400 MHz, DMSO- $d_6$ ) 193.78, 182.23, 160.28, 157.23, 143.0, 132.62, 126.9, 129.2, 115.43, 104.88, 53.0, 28.1, 15.2. MS: Cald. for  $\text{C}_{13}\text{H}_{12}\text{BrClN}_2\text{OS}$   $m/z$ : 380.9621 [ $\text{M}^++\text{H}$ ], Found= 380.9431.

**Ethyl 4-(2,4-difluorophenyl)-1,2,3,4-tetrahydro-6-methyl-2-oxopyrimidine-5-carboxylate, (4h)**

Yield 88 % :  $^1\text{H}$  NMR (400 MHz,  $\text{DMSO-}d_6$ )  $\delta$  10.35 (s, 1H), 9.2 (s, 1H), 7.0 – 7.05 (m, 2H), 7.14 – 7.01 (m, 1H), 5.25 (d, 1H), 3.85 – 3.88 (m, 2H), 2.33 (s, 3H), 1.01(t, 3H).  $^{13}\text{C}$  NMR (400 MHz,  $\text{DMSO-}d_6$ ) 173.10, 164.34, 147.39, 144.38, 134.73, 133.54, 128.84, 127.42, 121.10, 100.25, 60.24, 53.63, 17.66, 14.43. MS: Cald. for  $\text{C}_{14}\text{H}_{14}\text{F}_2\text{N}_2\text{O}_3$   $m/z$ : 319.0870 [ $\text{M}^+ + \text{Na}$ ], Found=319.0770.

**Ethyl-4-(4-bromo-3-chlorophenyl)-1,2,3,4-tetrahydro-6-methyl-2-thioxopyrimidine-5-carboxylate, (4i)**

Yield 89% :  $^1\text{H}$  NMR (400 MHz,  $\text{DMSO-}d_6$ )  $\delta$  10.28 (s, 1H), 9.42 (s, 1H), 7.22 – 7.10 (m, 2H), 7.11– 7.01 (m, 1H), 5.32 (d, 1H), 3.89 – 3.94 (m, 2H), 2.25 (s, 3H), 1.02 (t, 3H).  $^{13}\text{C}$  NMR (400 MHz,  $\text{DMSO-}d_6$ ) 174.79, 165.25, 146.28, 145.33, 134.72, 133.53, 128.81, 127.21, 121.17, 100.18, 60.22, 53.59, 17.65, 14.41. MS: Cald. for  $\text{C}_{14}\text{H}_{14}\text{BrClN}_2\text{O}_2\text{S}$   $m/z$ : 389.0708 [ $\text{M}^+ + \text{H}$ ], Found= 389.0208.

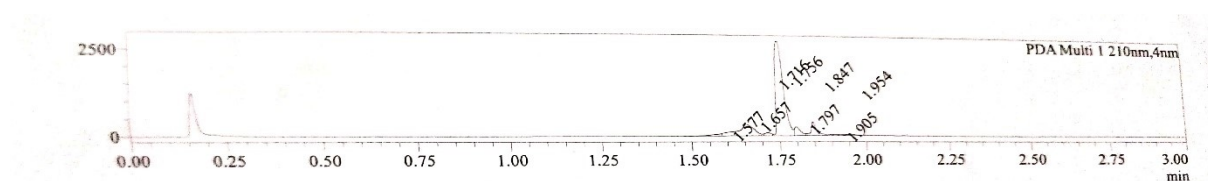

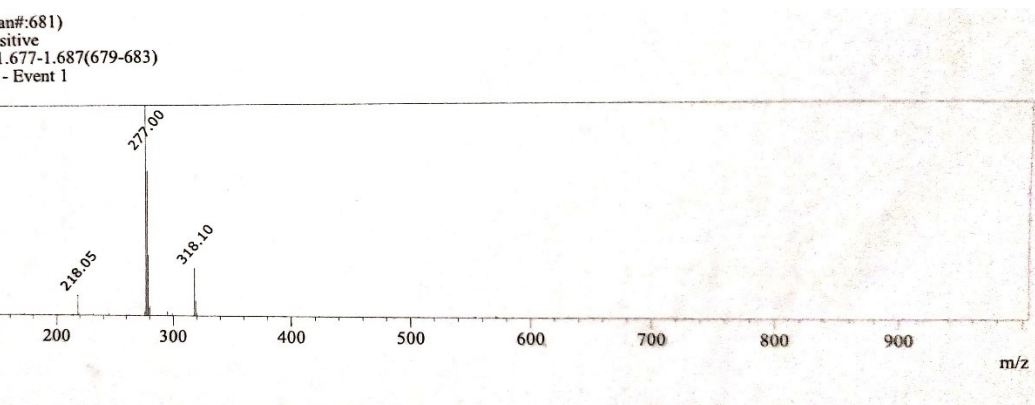

**Spectrum 1: LCMS of ethyl-1,2,3,4-tetrahydro-6-methyl-4-phenyl-2-thioxopyrimidine-5-carboxylate, (4a):**

2312117-GN-AR-FB 7 (0.135) Cm (7:24)

TOF MS ES+  
1.45e7

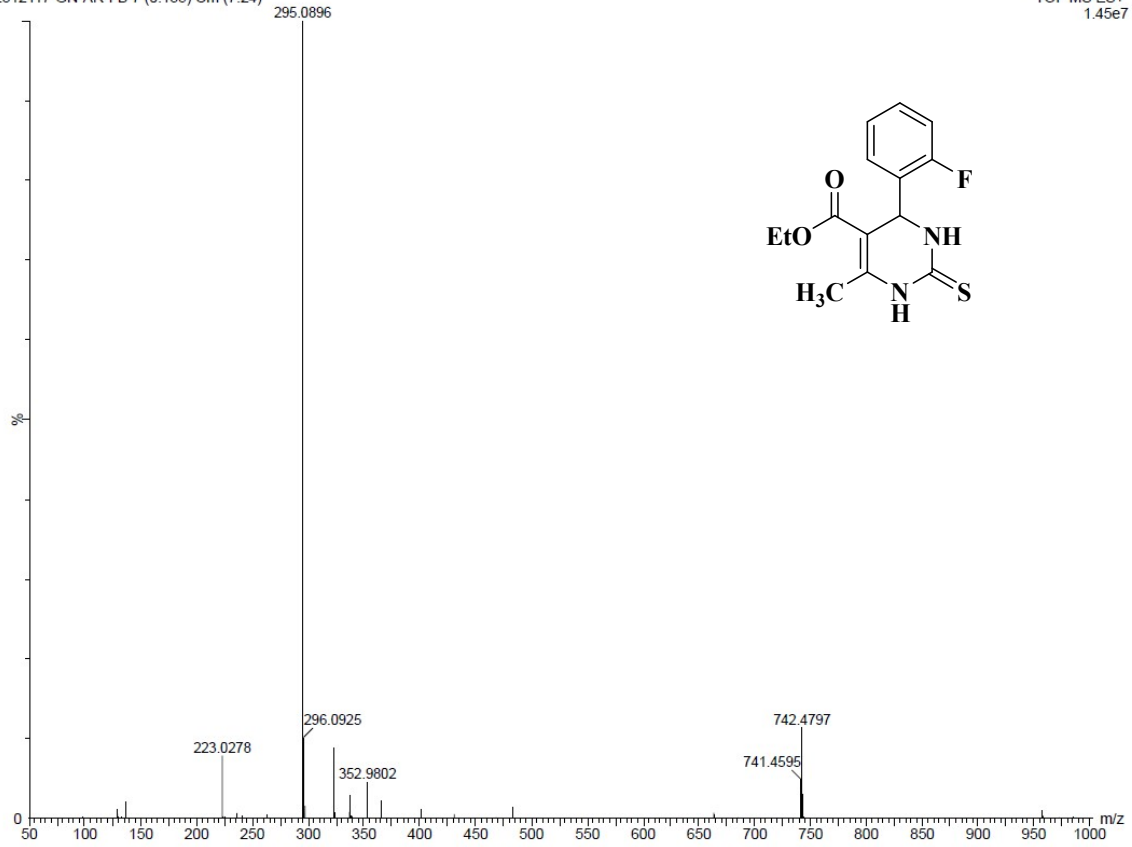

**Spectrum 2: HRMS of ethyl 4-(2-fluorophenyl)-1,2,3,4-tetrahydro-6-methyl-2-thioxopyrimidine-5-carboxylate, (4b)**

2304980-GN-RA-BR 5 (0.101) Cm (5:8)

TOF MS ES-  
1.16e6

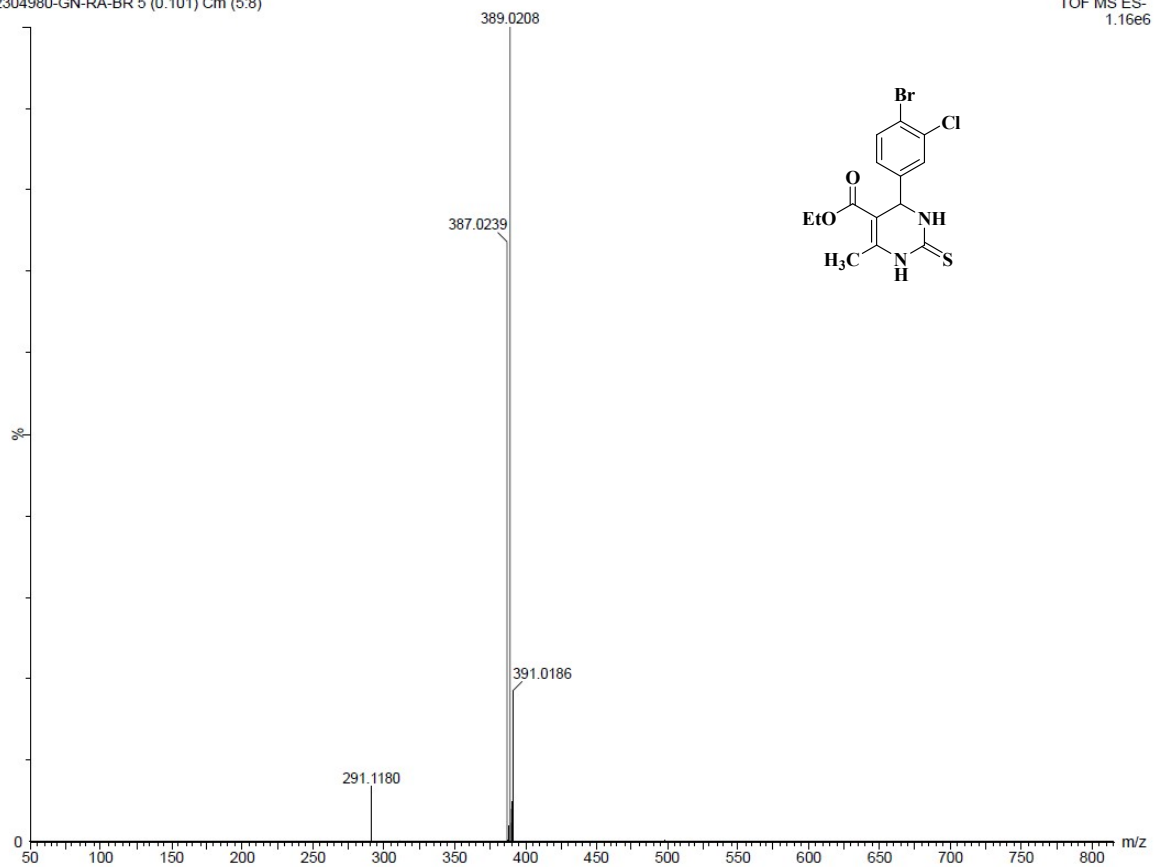

### Spectrum 3: HRMS of ethyl-4-(4-bromo-3-chlorophenyl)-1,2,3,4-tetrahydro-6-methyl-2-oxopyrimidine-5-carboxylate, (4d)

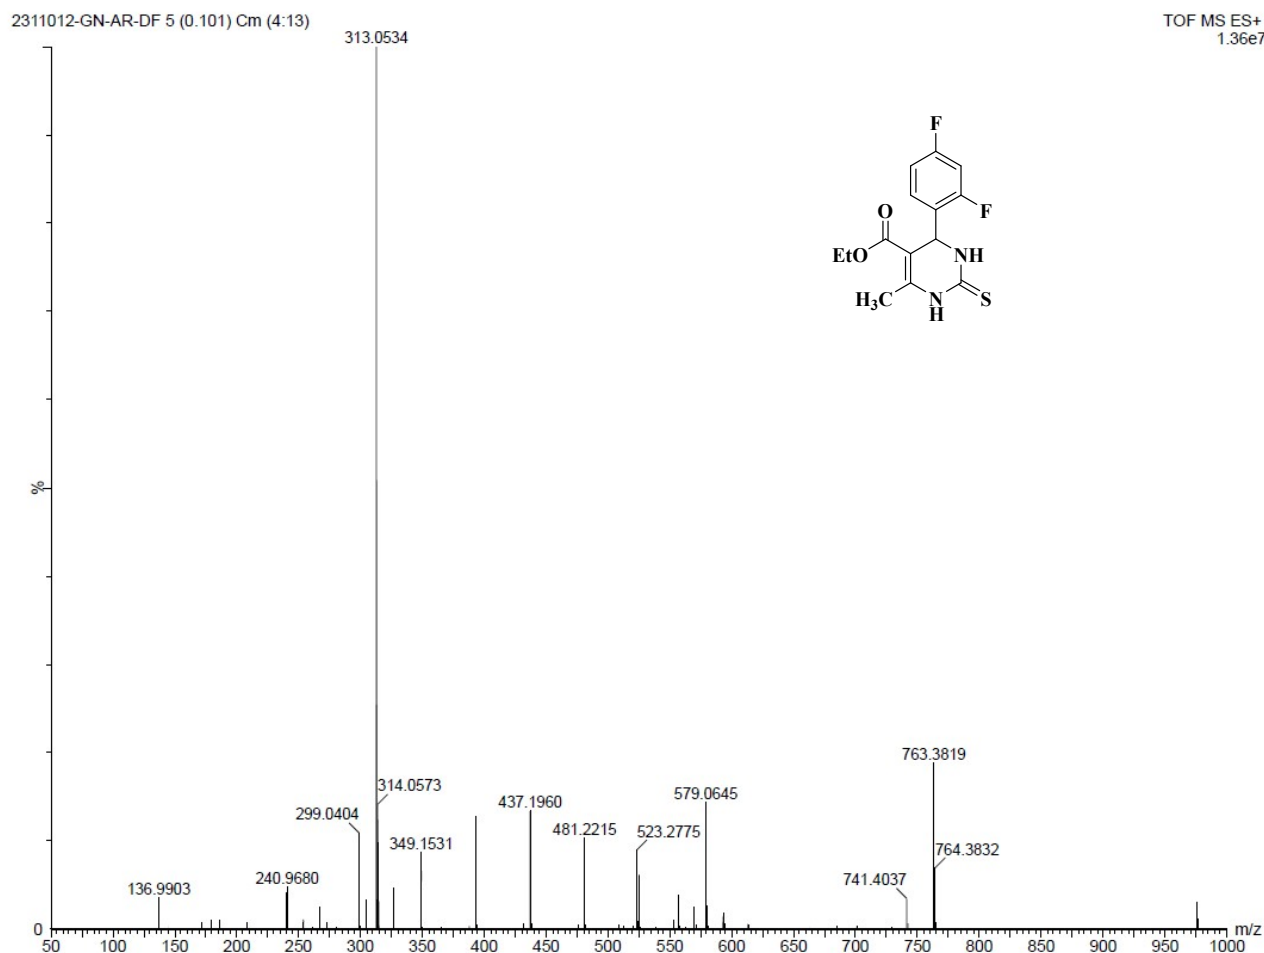

### Spectrum 4: HRMS of ethyl-4-(2,4-difluorophenyl)-1,2,3,4-tetrahydro-6-methyl-2-thioxopyrimidine-5-carboxylate, (4c)

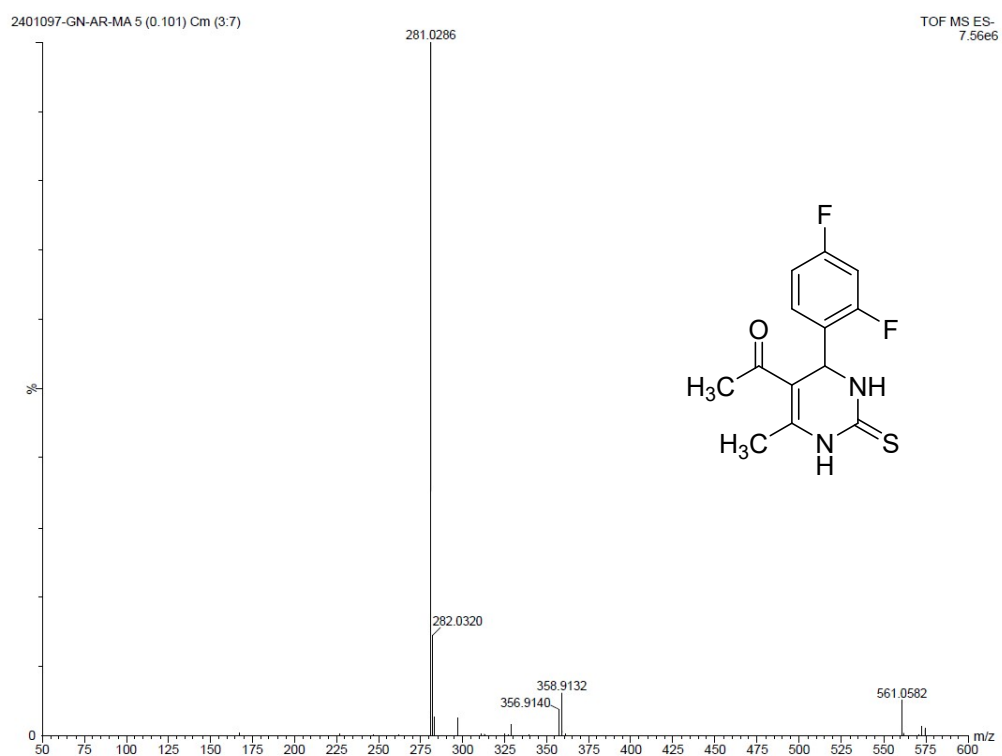

**Spectrum 5: HRMS of 1-(4-(2,4-difluorophenyl)-6-methyl-2-thioxo-1,2,3,4-tetrahydropyrimidin-5-yl)ethan-1-one,(4f)**

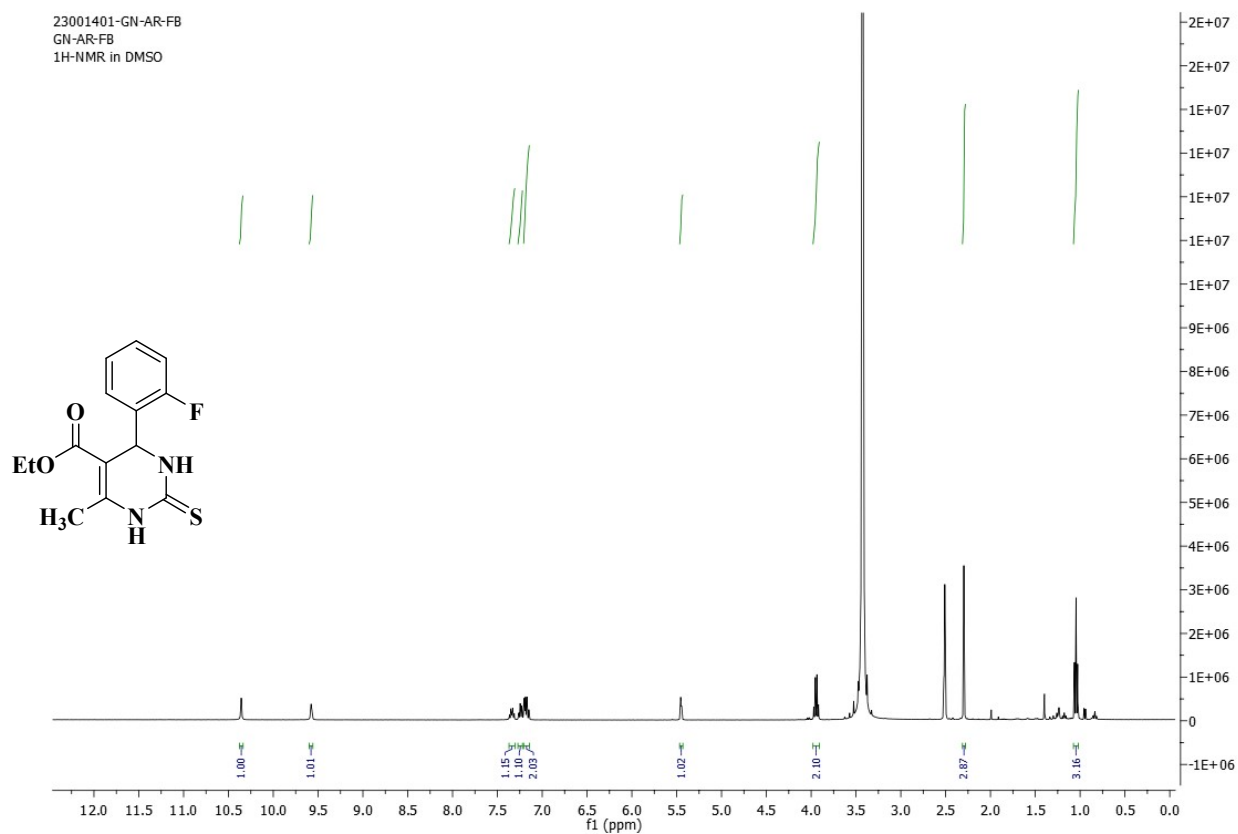

**Spectrum 6: <sup>1</sup>H NMR of Ethyl 4-(2-fluorophenyl)-1,2,3,4-tetrahydro-6-methyl-2-thioxopyrimidine-5-carboxylate, (4b)**

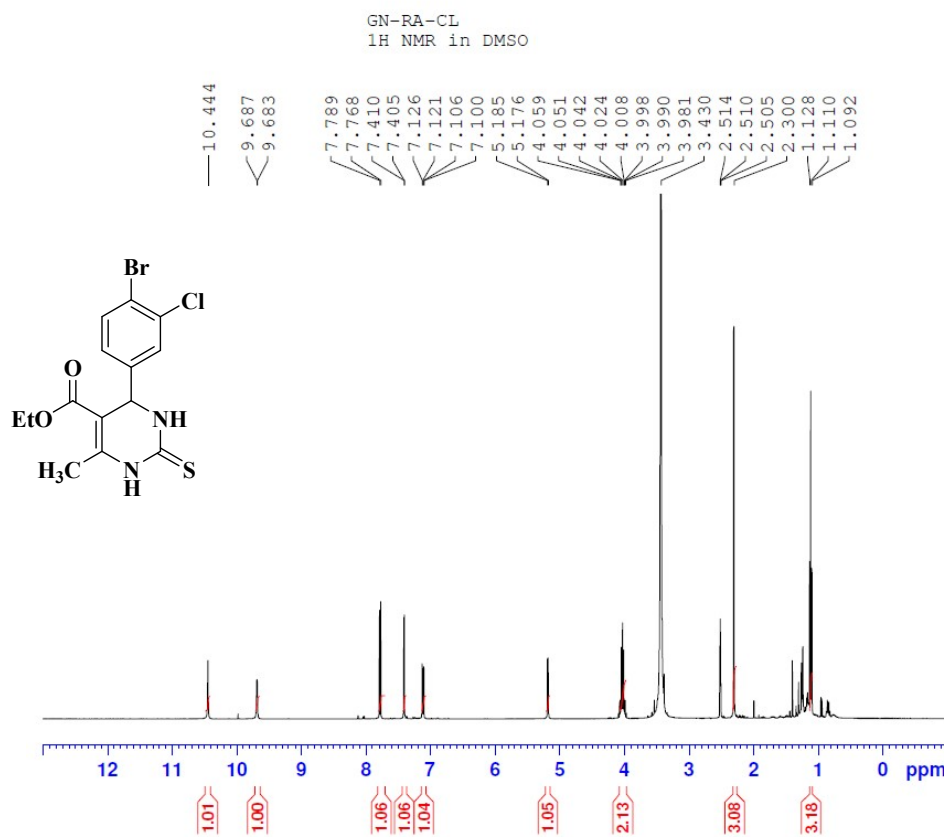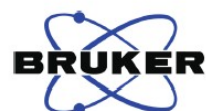

Current Data Parameters  
NAME 23001333-GN-RA-CL  
EXPNO 1  
PROCNO 1

F2 - Acquisition Parameters  
Date\_ 20231206  
Time 17.10 h  
INSTRUM spect  
PROBHD Z108618\_0984 (  
PULPROG zg30  
TD 65536  
SOLVENT DMSO  
NS 32  
DS 2  
SWH 8012.820 Hz  
FIDRES 0.244532 Hz  
AQ 4.0894465 sec  
RG 89.93  
DW 62.400 usec  
DE 17.09 usec  
TE 296.9 K  
D1 1.00000000 sec  
TD0 1  
SFO1 400.3124719 MHz  
NUC1 1H  
PO 4.67 usec  
P1 14.00 usec  
PLW1 11.28999996 W

F2 - Processing parameters  
SI 65536  
SF 400.3100000 MHz  
WDW EM  
SSB 0  
LB 0.30 Hz  
GB 0  
PC 1.00

**Spectrum 7: <sup>1</sup>H NMR of ethyl-4-(4-bromo-3-chlorophenyl)-1,2,3,4-tetrahydro-6-methyl-2-thioxopyrimidine-5-carboxylate, (4d)**

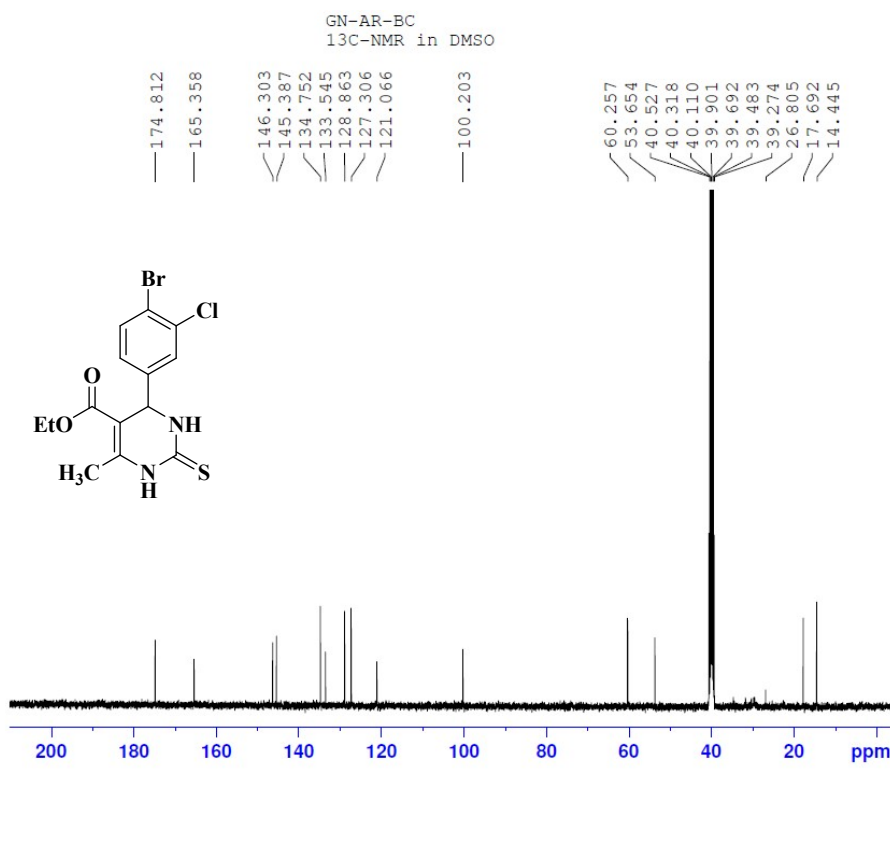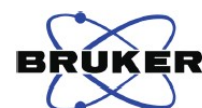

Current Data Parameters  
NAME 23001403-GN-AR-BC  
EXPNO 2  
PROCNO 1

F2 - Acquisition Parameters  
Date\_ 20231216  
Time 10.40 h  
INSTRUM spect  
PROBHD Z108618\_0984 (  
PULPROG zgpg30  
TD 65536  
SOLVENT DMSO  
NS 1024  
DS 4  
SWH 26041.666 Hz  
FIDRES 0.794729 Hz  
AQ 1.2582912 sec  
RG 2050  
DW 19.200 usec  
DE 6.50 usec  
TE 297.2 K  
D1 1.00000000 sec  
D11 0.03000000 sec  
TD0 1  
SFO1 100.6680954 MHz  
NUC1 13C  
PO 3.33 usec  
P1 10.00 usec  
PLW1 51.02600098 W  
SFO2 400.3116012 MHz  
NUC2 1H  
CPDPRG[2] waltz65  
PCPD2 90.00 usec  
PLW2 11.28999996 W  
PLW12 0.27318001 W  
PLW13 0.13741000 W

F2 - Processing parameters  
SI 32768  
SF 100.6580296 MHz  
WDW EM  
SSB 0  
LB 1.00 Hz  
GB 0  
PC 1.40



**Spectrum 8:  $^{13}\text{C}$  NMR of ethyl-4-(4-bromo-3-chlorophenyl)-1,2,3,4-tetrahydro-6-methyl-2-thioxopyrimidine-5-carboxylate, (4d)**

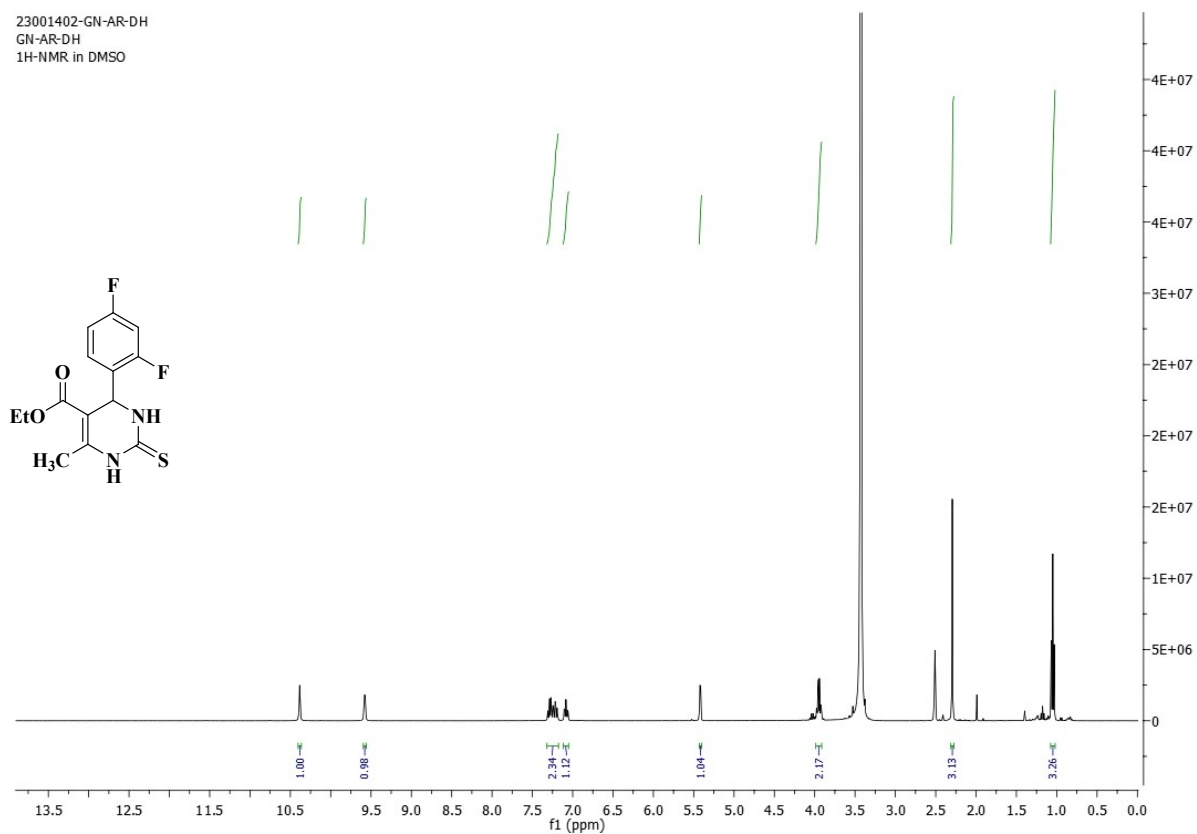

**Spectrum 9:  $^1\text{H}$  NMR of ethyl-4-(2,4-difluorophenyl)-1,2,3,4-tetrahydro-6-methyl-2-thioxopyrimidine-5-carboxylate, (4c)**

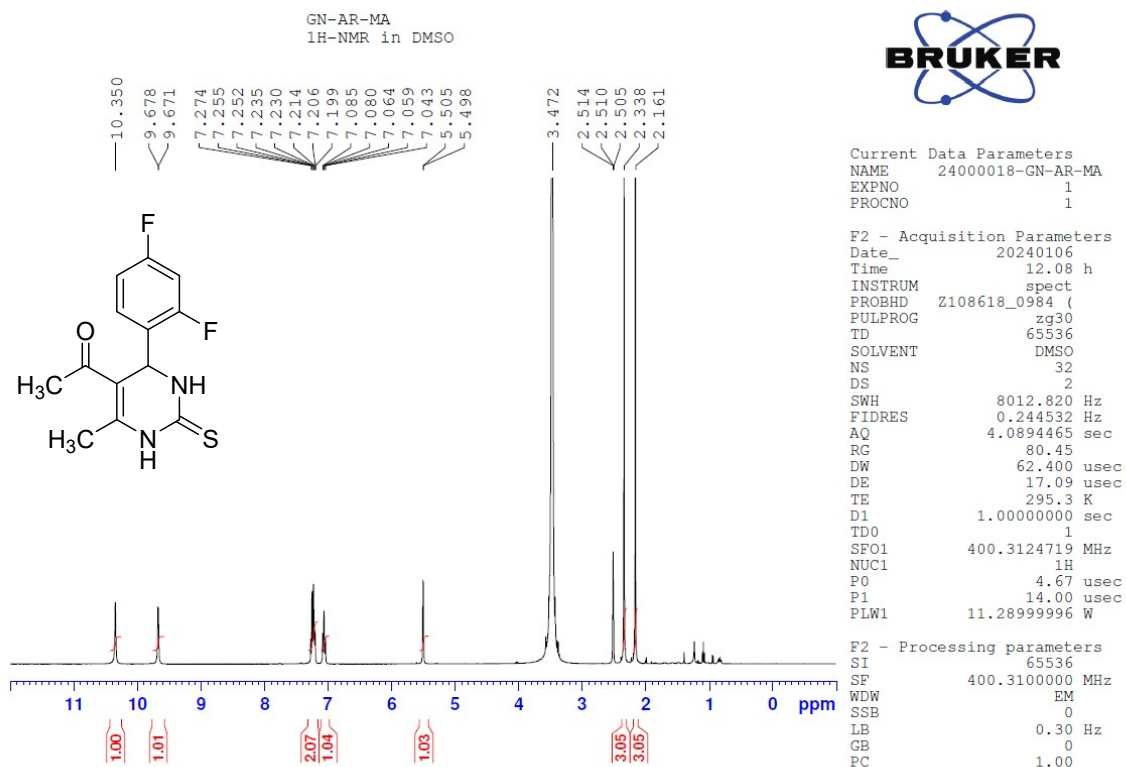

**Spectrum 10:  $^1\text{H}$  NMR of 1-(4-(2,4-difluorophenyl)-6-methyl-2-thioxo-1,2,3,4-tetrahydropyrimidin-5-yl)ethan-1-one,(4f)**

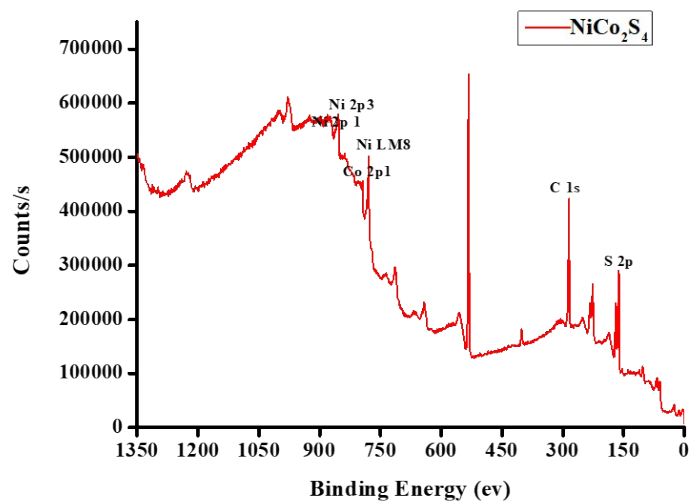

**XPS survey spectrum for  $\text{NiCo}_2\text{S}_4$ .**

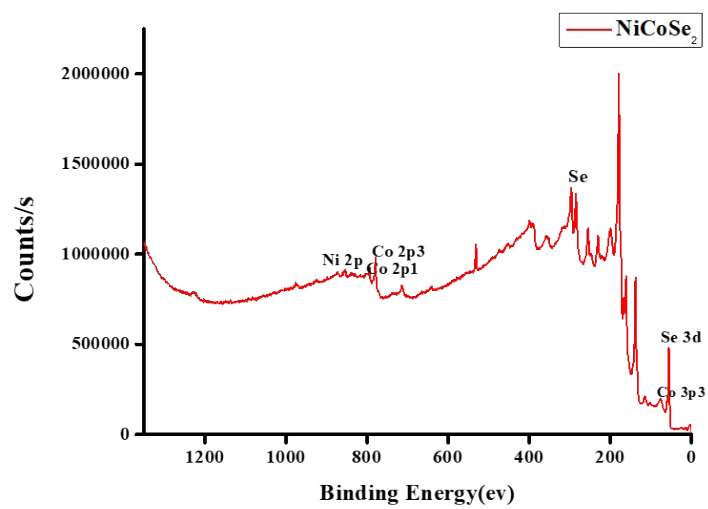

XPS survey spectrum for NiCoSe<sub>2</sub>.
